# Supplementary material
Source: PubMed Central journal article supplement (PMC7450487)
Supplement: NIHMS1612768-supplement-1.pdf [file NIHMS1612768-supplement-1.pdf]

**SUPPLEMENTAL MATERIAL I. INITIAL VISIT OF PATIENT WITH ALOPECIA AREATA**

I. History

- A. Name: \_\_\_\_\_
- B. Date: \_\_\_\_\_
- C. Date of birth: \_\_\_\_\_
- D. Race: \_\_\_\_\_
- E. Sex: \_\_\_\_\_
- F. Age of first episode of hair loss: \_\_\_\_\_. Full regrowth? (yes/no)
- G. Subsequent episodes of hair loss? Yes/no. If yes, how many? \_\_\_\_\_
- H. Approximate age and/or dates of last 3 episodes:
  - 1. Episode 1: \_\_\_\_\_
  - 2. Episode 2: \_\_\_\_\_
  - 3. Episode 3: \_\_\_\_\_

I. What is the longest period of time for which you have had an episode with any amount of hair loss? \_\_\_\_\_ month or years (Please circle one.)

J. Family history of alopecia areata (yes/no). If yes, in which members and how extensive was their hair loss. (Please put number next to family member: use a 1 for alopecia totalis/alopecia universalis or 2 for patchy.)

- 1. Mother: \_\_\_\_\_
- 2. Father: \_\_\_\_\_
- 3. Brother: \_\_\_\_\_
- 4. Sister: \_\_\_\_\_
- 5. Grandmother (Please circle 1: maternal or paternal): \_\_\_\_\_
- 6. Grandfather (Please circle 1: maternal or paternal): \_\_\_\_\_
- 7. Other: \_\_\_\_\_

K. Concurrent medical problems:

- 1. Thyroid disease (yes/no). If yes, hyperthyroid (yes/no); hypothyroid (yes/no)
- 2. Iron deficiency (yes/no)
- 3. Diabetes (yes/no). If yes, please circle how controlled: controlled by diet, controlled by oral medication, insulin required.
- 4. Celiac disease (yes/no)
- 5. Rheumatoid arthritis (yes/no)
- 6. Other autoimmune diseases, personal and family \_\_\_\_\_  
\_\_\_\_\_  
\_\_\_\_\_

L. History: asthma (yes/no), hay fever (yes/no), atopic dermatitis or eczema (yes/no), allergic rhinitis (yes/no), family history of these conditions (yes/no).

M. Prior and current treatments for current episode of hair loss. Response may be patient-reported if no physician assessment performed and noted as none, some, or complete regrowth.

- 1. Treatment: \_\_\_\_\_ Date started: \_\_\_\_\_ Date stopped: \_\_\_\_\_  
Dose or frequency of injections: \_\_\_\_\_ Response: \_\_\_\_\_  
Any adverse effect: \_\_\_\_\_
- 2. Treatment: \_\_\_\_\_ Date started: \_\_\_\_\_ Date stopped: \_\_\_\_\_  
Dose or frequency of injections \_\_\_\_\_ Response: \_\_\_\_\_  
Any adverse effect: \_\_\_\_\_
- 3. Treatment: \_\_\_\_\_ Date started: \_\_\_\_\_ Date stopped: \_\_\_\_\_  
Dose or frequency of injections \_\_\_\_\_ Response: \_\_\_\_\_  
Any adverse effect: \_\_\_\_\_
- 4. Treatment: \_\_\_\_\_ Date started: \_\_\_\_\_ Date stopped: \_\_\_\_\_  
Dose or frequency of injections: \_\_\_\_\_ Response: \_\_\_\_\_  
Any adverse effect: \_\_\_\_\_

## II. Physical examination

- A. Severity of Alopecia Tool score (see figure to record each area): \_\_\_\_\_
- B. Scalp, Body, and Nail (SBN) categorization: \_\_\_\_\_
- A. Scalp (S): The hair loss pertains only to terminal hair and excludes vellus hair
- S<sub>0</sub>: 0%-24%
  - S<sub>1</sub>: 25%-49%
  - S<sub>2</sub>: 50%-74%
  - S<sub>3</sub>: 75%-99%
  - S<sub>4a</sub>: 76%-95%
  - S<sub>4b</sub>: 96%-99%
  - S<sub>5</sub>: 100% scalp hair loss
  - Any vellus hair growth (yes/no). If yes, % of scalp covered \_\_\_\_\_
- B. Body hair loss (B):
- B<sub>0</sub>: none
  - B<sub>1</sub>: some
  - B<sub>2</sub>: total
- C. Nails (N):
- N<sub>0</sub>: no involvement
  - N<sub>1</sub>: some involvement
  - N<sub>2</sub>: a. all 20 nails show dense pitting (defined as 2 pits per nail)  
b. all 20 nails show trachonychia (20-nail dystrophy)
- C. Activity of hair loss:
- Exclamation point hairs: yes/no
  - Hair pull: positive yes/no
    - Anagen hairs: yes/no
    - Telogen hairs: yes/no
- D. Color of hair:
- Natural color: \_\_\_\_\_
  - Current hair growth: \_\_\_% natural color; \_\_\_ % unpigmented
- E. Lesional assessment for those wanting to assess local therapy in target area(s):
- Area of target areas: Long diameter \_\_\_ × perpendicular diameter \_\_\_ = area \_\_\_ cm<sup>2</sup>, or for circular areas,  $\pi r^2 = \text{area} \text{ cm}^2$
  - Hair density in area based on a number from 0 to 100 representing hair loss
  - Lesional alopecia and density = area × density = \_\_\_\_\_

## SUPPLEMENTAL MATERIAL II. RETURN VISIT OF PATIENT WITH ALOPECIA AREATA

### I. History

A. Name: \_\_\_\_\_

B. Date: \_\_\_\_\_

C. Date of birth: \_\_\_\_\_

#### D. Treatment:

1. Current treatment: \_\_\_\_\_ Date started: \_\_\_\_\_ Date stopped: \_\_\_\_\_ Dose or frequency of injections: \_\_\_\_\_ Response: \_\_\_\_\_

Any adverse effect: \_\_\_\_\_

2. Current treatment: \_\_\_\_\_ Date started: \_\_\_\_\_ Date stopped: \_\_\_\_\_ Dose or frequency of injections: \_\_\_\_\_ Response: \_\_\_\_\_

Any adverse effect: \_\_\_\_\_

3. Current treatment: \_\_\_\_\_ Date started: \_\_\_\_\_ Date stopped: \_\_\_\_\_ Dose or frequency of injections: \_\_\_\_\_ Response: \_\_\_\_\_

Any adverse effect: \_\_\_\_\_

### II. Physical examination

A. Severity of Alopecia Tool (SALT) score (see Fig 1 to record each area): \_\_\_\_\_

1. Change in SALT score =  $\text{Baseline SALT} - \text{SALT today} / \text{SALT at baseline} \times 100 =$  \_\_\_\_\_

B. Color of regrowing hair: natural color (yes/no), white (yes/no), or mixed (yes/no)

C. Vellus hair growth (yes/no). If yes, % of scalp covered: \_\_\_\_\_

#### D. Signs of active loss:

1. Exclamation point hairs: yes/no

2. Hair pull: positive yes/no

a. Anagen hairs: yes/no

b. Telogen hairs: yes/no

E. Lesional alopecia and density (LAD) score for those wanting to assess local therapy in target area(s):

1. Long diameter \_\_\_\_\_  $\times$  perpendicular diameter \_\_\_\_\_ = area \_\_\_\_\_

2. Hair density in area based on a number from 0 to 100 representing hair loss

3. LAD = area  $\times$  density = \_\_\_\_\_

4. Change in LAD =  $\text{LAD at baseline} - \text{LAD today} / \text{LAD at baseline} \times 100 =$  \_\_\_\_\_
